# Supplementary material for: Complementary roles of murine NaV1.7, NaV1.8 and NaV1.9 in acute itch signalling
Source: PubMed Central journal article supplement (PMC7012836; doi:10.1038/s41598-020-59092-2), 2020-02-11
Supplement: 41598_2020_59092_MOESM1_ESM.pdf [file 41598_2020_59092_MOESM1_ESM.pdf]

# Supplementary Information

## Complementary roles of murine Nav1.7, Nav1.8 and Nav1.9 in acute itch signalling

Helen Kühn, Leonie Kappes, Katharina Wolf, Lisa Gebhardt, Markus F. Neurath, Peter Reeh, Michael Fischer, Andreas E. Kremer

**Supplementary Figure S1** – No sex differences in the acute scratch behaviour in Nav1.7<sup>-/-</sup>, Nav1.8<sup>-/-</sup>, Nav1.9<sup>-/-</sup> and wild type mice upon intradermal injection of pruritogens. **(a-j)** Data are identical to Figure 1, but separated by sex. Scratch events within 30 min after intradermal injection, concentrations of substances as in Figure 1: C48/80 (2 g/l), endothelin (1 μM), 5-HT (1 mM), chloroquine (4 mM), histamine (89 mM), LPA (4 mM), trypsin (10 U/μl), SLIGRL (2 mM) and β-alanine (224 mM). Pruritogens are displayed in order of potency, sorted according to the mean scratch behaviour induced in wild type mice. **(k)** Grand sum of the scratch behaviour across all displayed pruritogens. The number of animals is visualized by individual dots in the bar charts. error bars: s.e.m

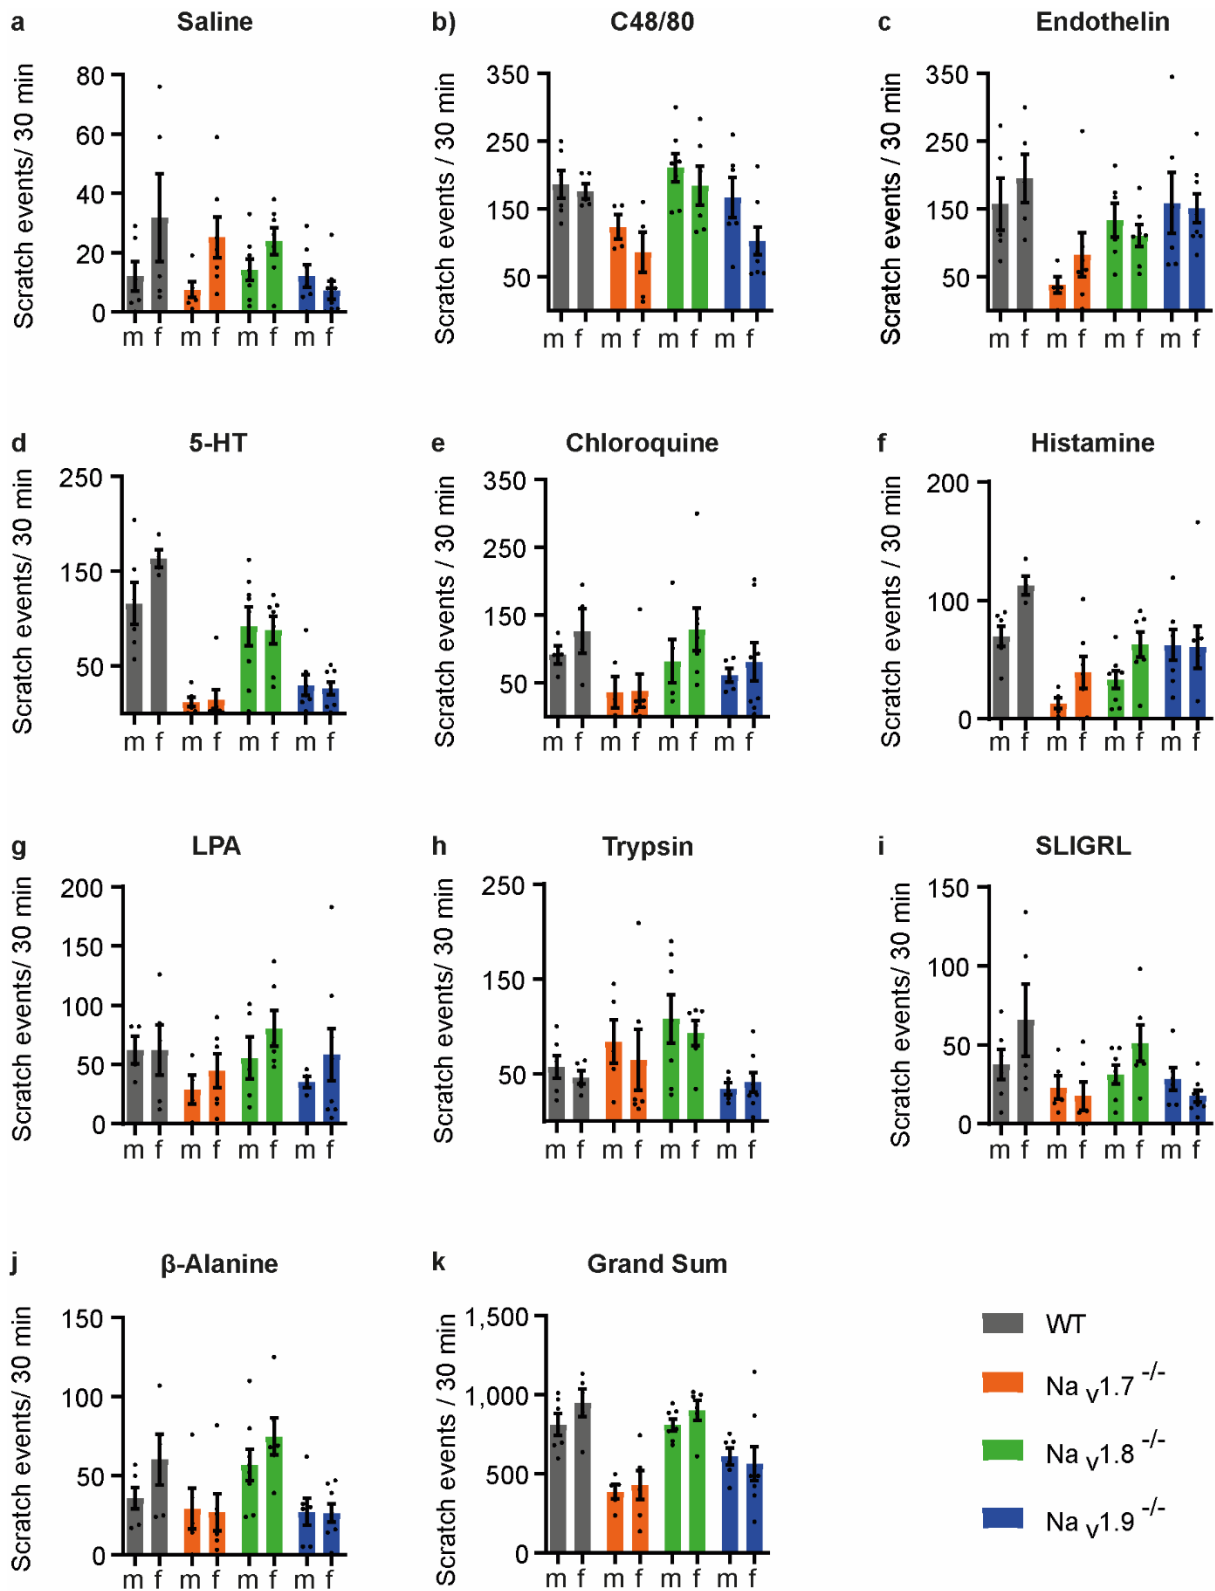

**Supplementary table S1 – Primers used for quantitative real-time PCR**

| <b>Gene</b>   | <b>Primer direction</b> | <b>Primer Sequence</b>    | <b>Product Size</b> |
|---------------|-------------------------|---------------------------|---------------------|
| Murine HPRT   | FW                      | ACAGGCCAGACTTTGTTGGAT     | 150 bp              |
|               | RV                      | ACTTGCGCTCATCTTAGGCT      |                     |
| Murine TRPV4  | FW                      | GGACCCTGGCAAGAGTGAAATC    | 301 bp              |
|               | RV                      | CACCGGACAAATGCCTAAATGT    |                     |
| Murine TRPA1  | FW                      | TCCAAATTTTCCAACAGAAAAGGAA | 147 bp              |
|               | RV                      | TCGCTATTGCTCCACATTGC      |                     |
| Murine TRPV1  | FW                      | AGCTACTACAAGGGCCAGAC      | 120 bp              |
|               | RV                      | GAAGAAGTCCCCGTTAGCAG      |                     |
| Murine Nav1.7 | FW                      | GTGATTGGGAACCTTGTGGT      | 114 bp              |
|               | RV                      | AATCTGGAGGTTGTTTGCCT      |                     |
| Murine Nav1.8 | FW                      | GTGTGCATGACCCGAAGTATCT    | 101 bp              |
|               | RV                      | CAAAACCCTCTTGCCAGTATCT    |                     |
| Murine Nav1.9 | FW                      | CAGTCGTCCTAGCAGTAACA      | 151 bp              |
|               | RV                      | TCCGATGACAATGAAGTCCA      |                     |
